# Supplementary material for: Comparative Transcriptome Analysis of Deep-Rooting and Shallow-Rooting Potato (Solanum tuberosum L.) Genotypes under Drought Stress
Source: MDPI journal article supplement (doi:10.3390/plants11152024), 2022-08-03
Supplement: s1 [file s1]

Figure S1. Comparison of the randomly selected twelve genes expression between RNA sequencing and qPCR.

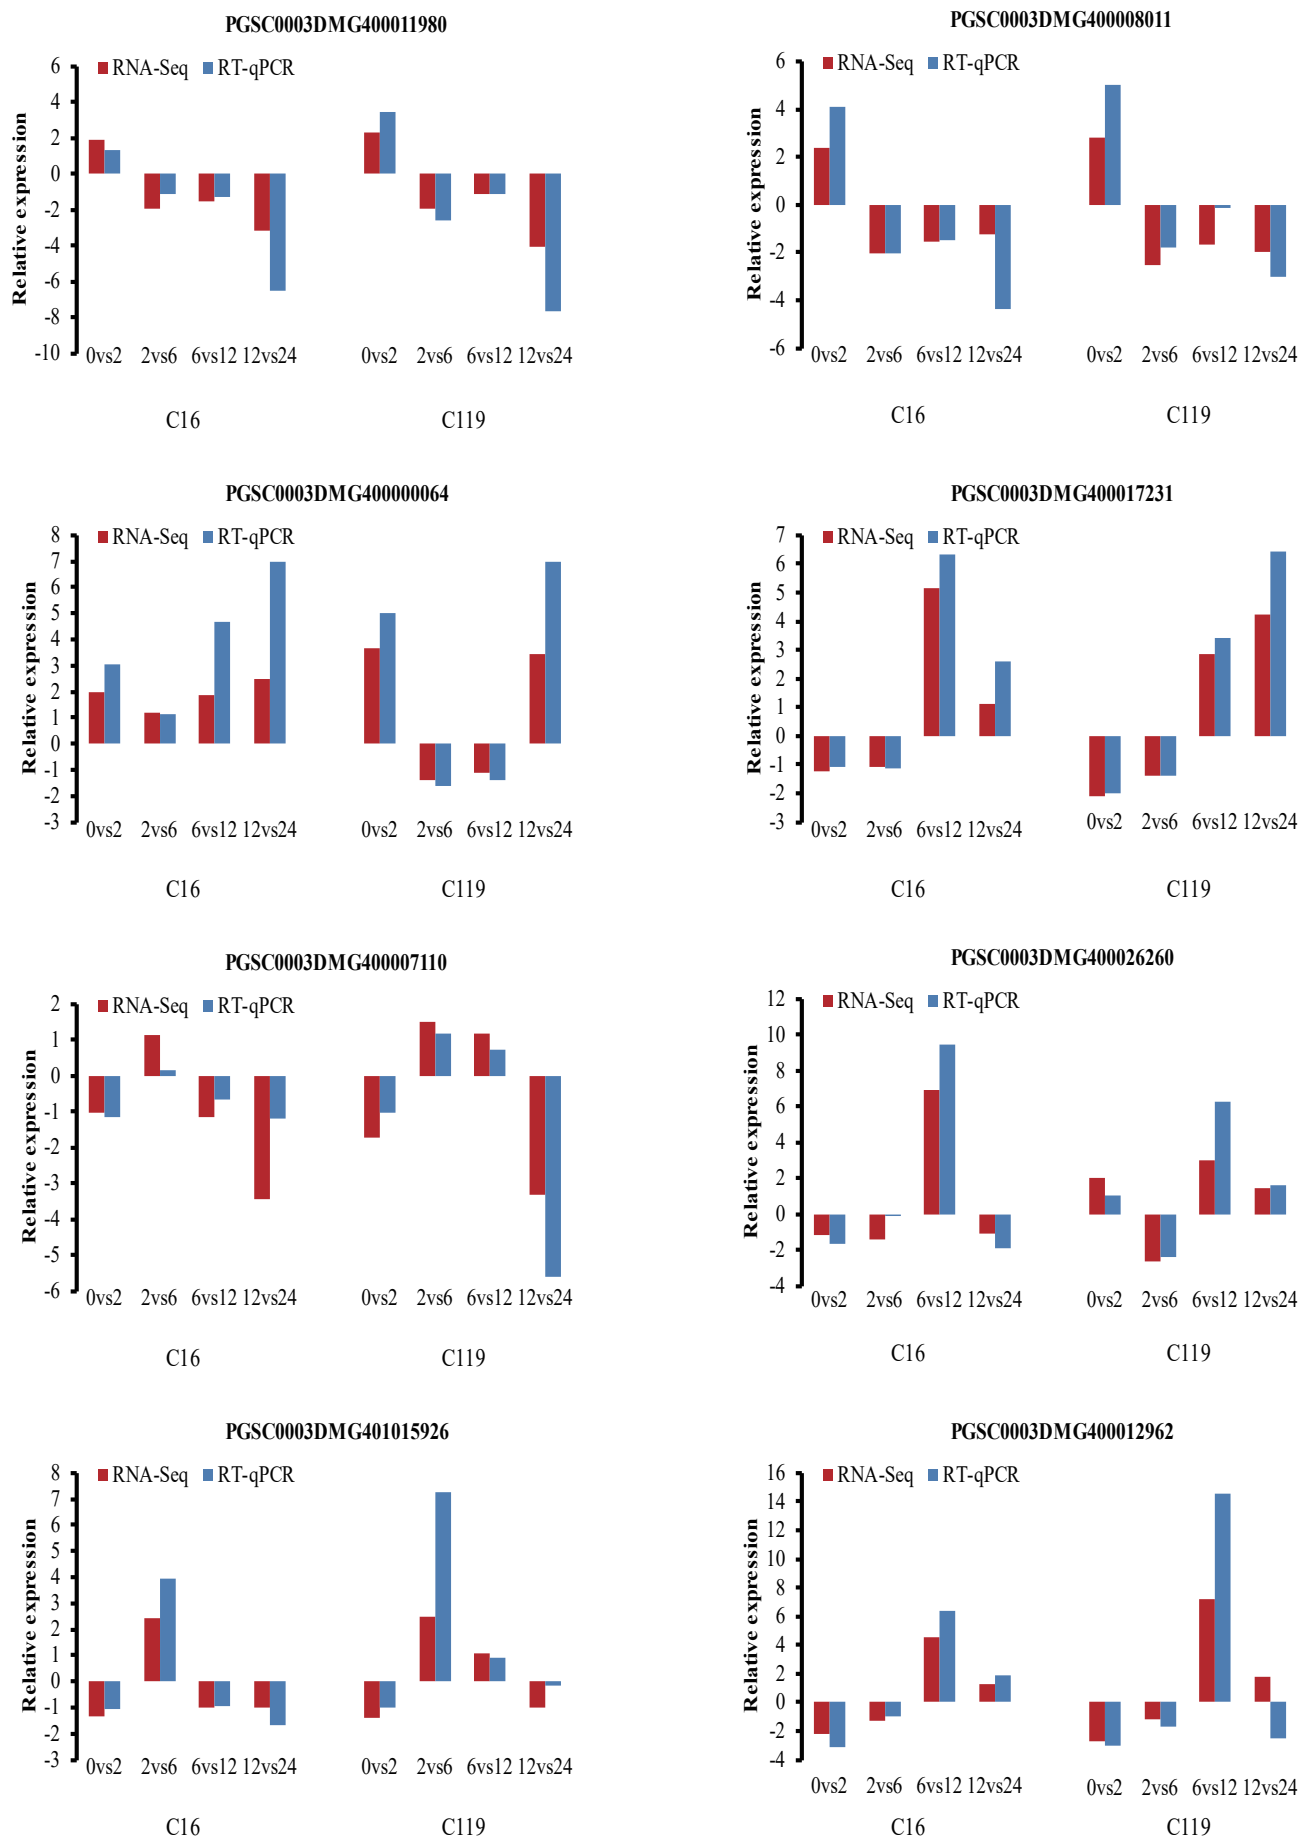

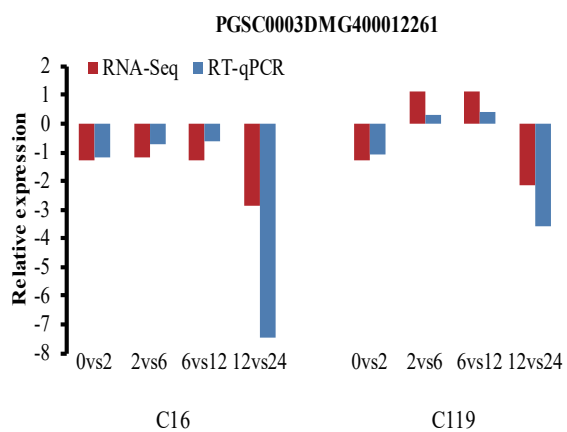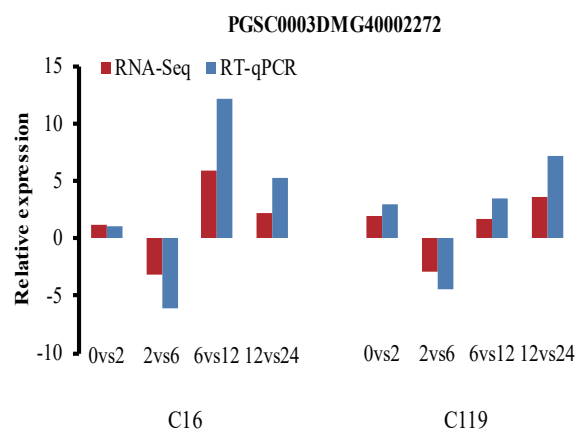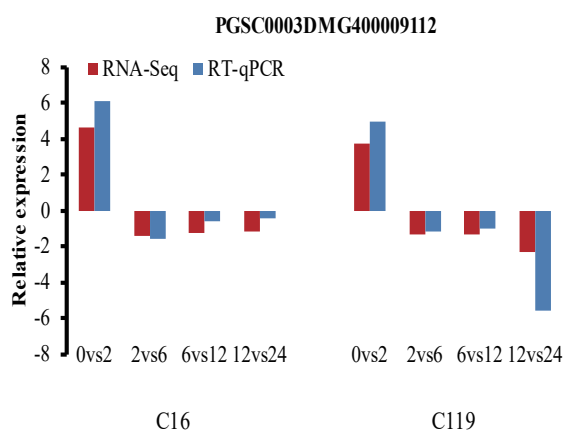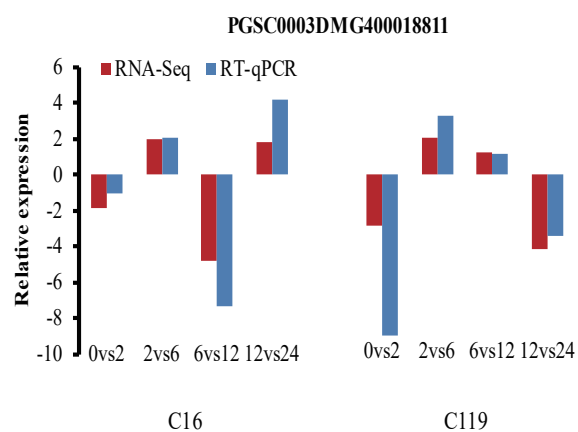

**Figure S1**
