# Supplementary material for: Comparative Transcriptome Analysis of Deep-Rooting and Shallow-Rooting Potato (Solanum tuberosum L.) Genotypes under Drought Stress
Source: MDPI journal article supplement (doi:10.3390/plants11152024), 2022-08-03
Supplement: s1 [file s1]

**Figure S2. Gene ontology (GO) analyses for the DEGs of the two potato genotypes at T2 vs.T0 (A), T6 vs.T2 (B), T12 vs.T6 (C) and T24 vs.T12 (D). \* indicates significant correlation at  $p < 0.05$  level, while \*\* indicates a highly significant correlation at  $p < 0.01$  level.**

**A**

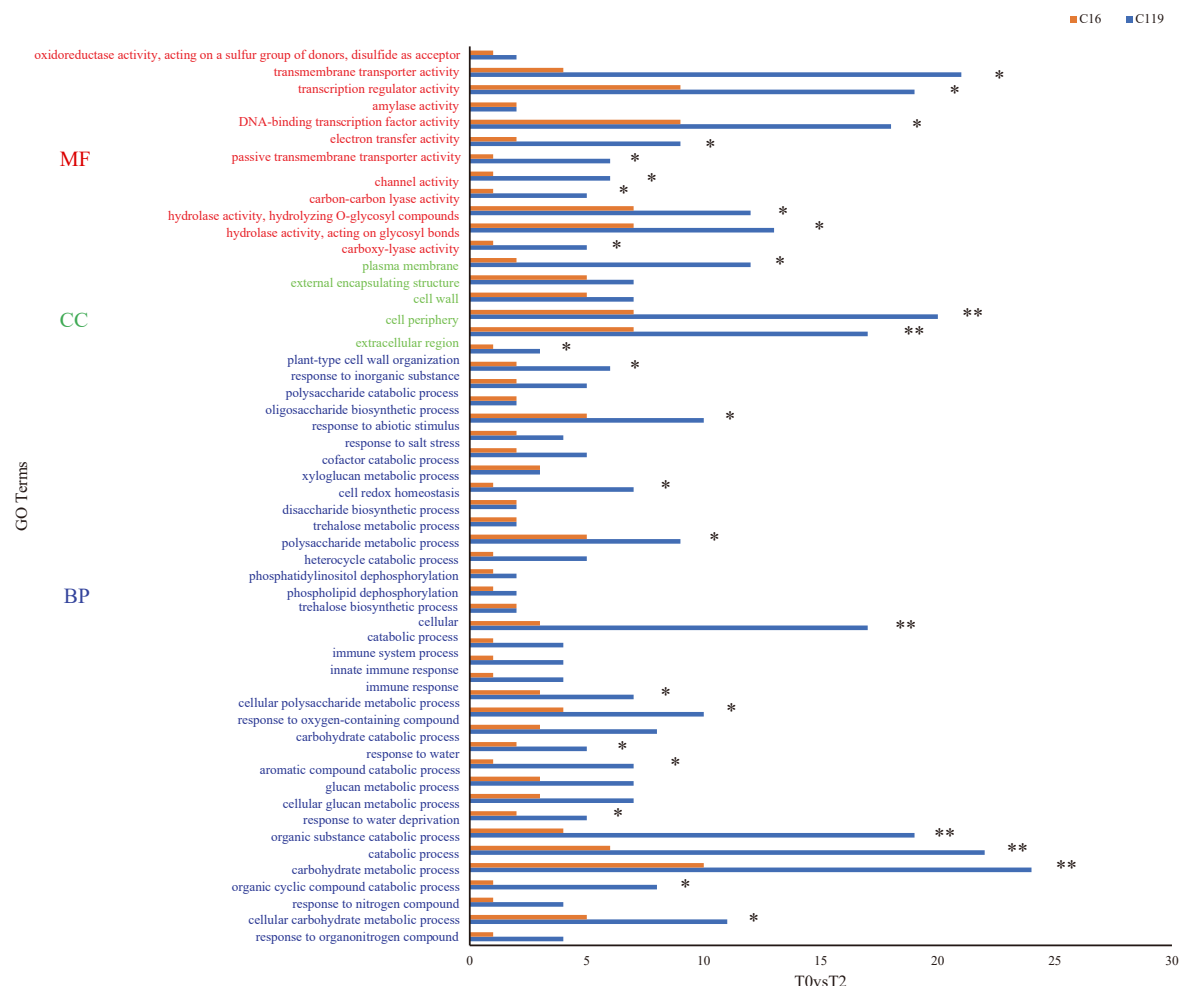

**B**

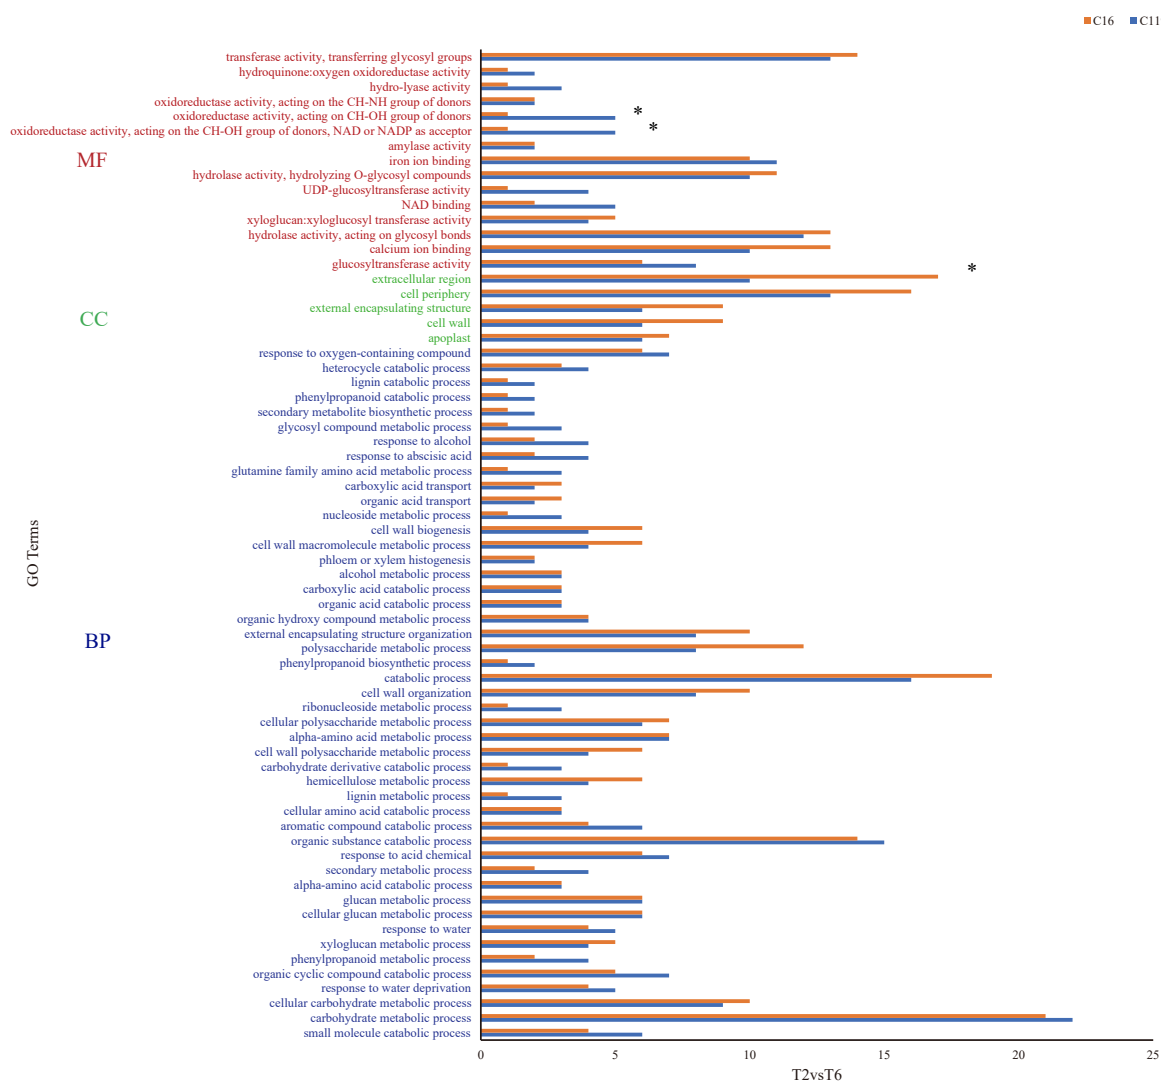

C

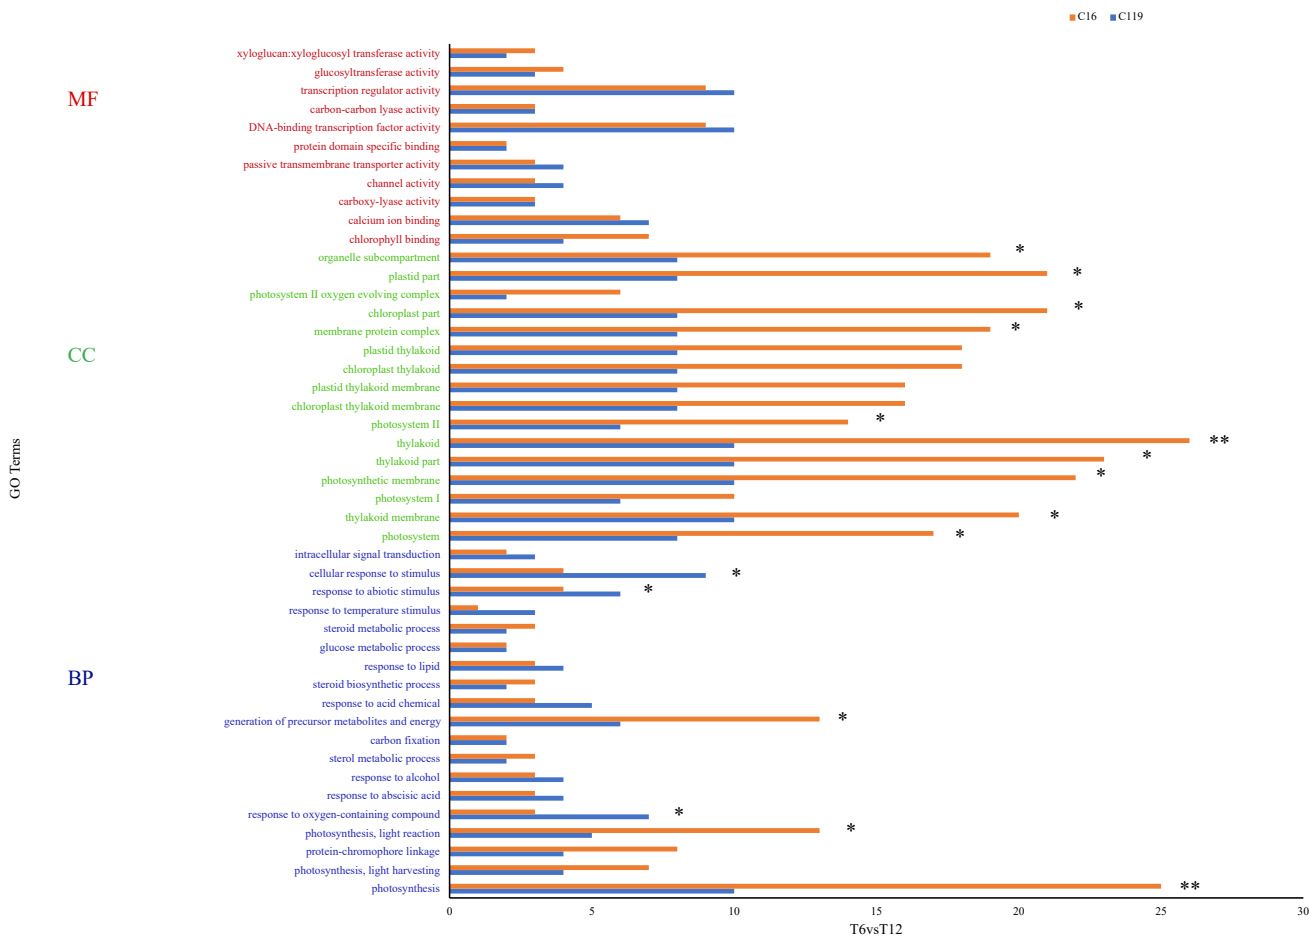

D

C16 C119

GO Terms

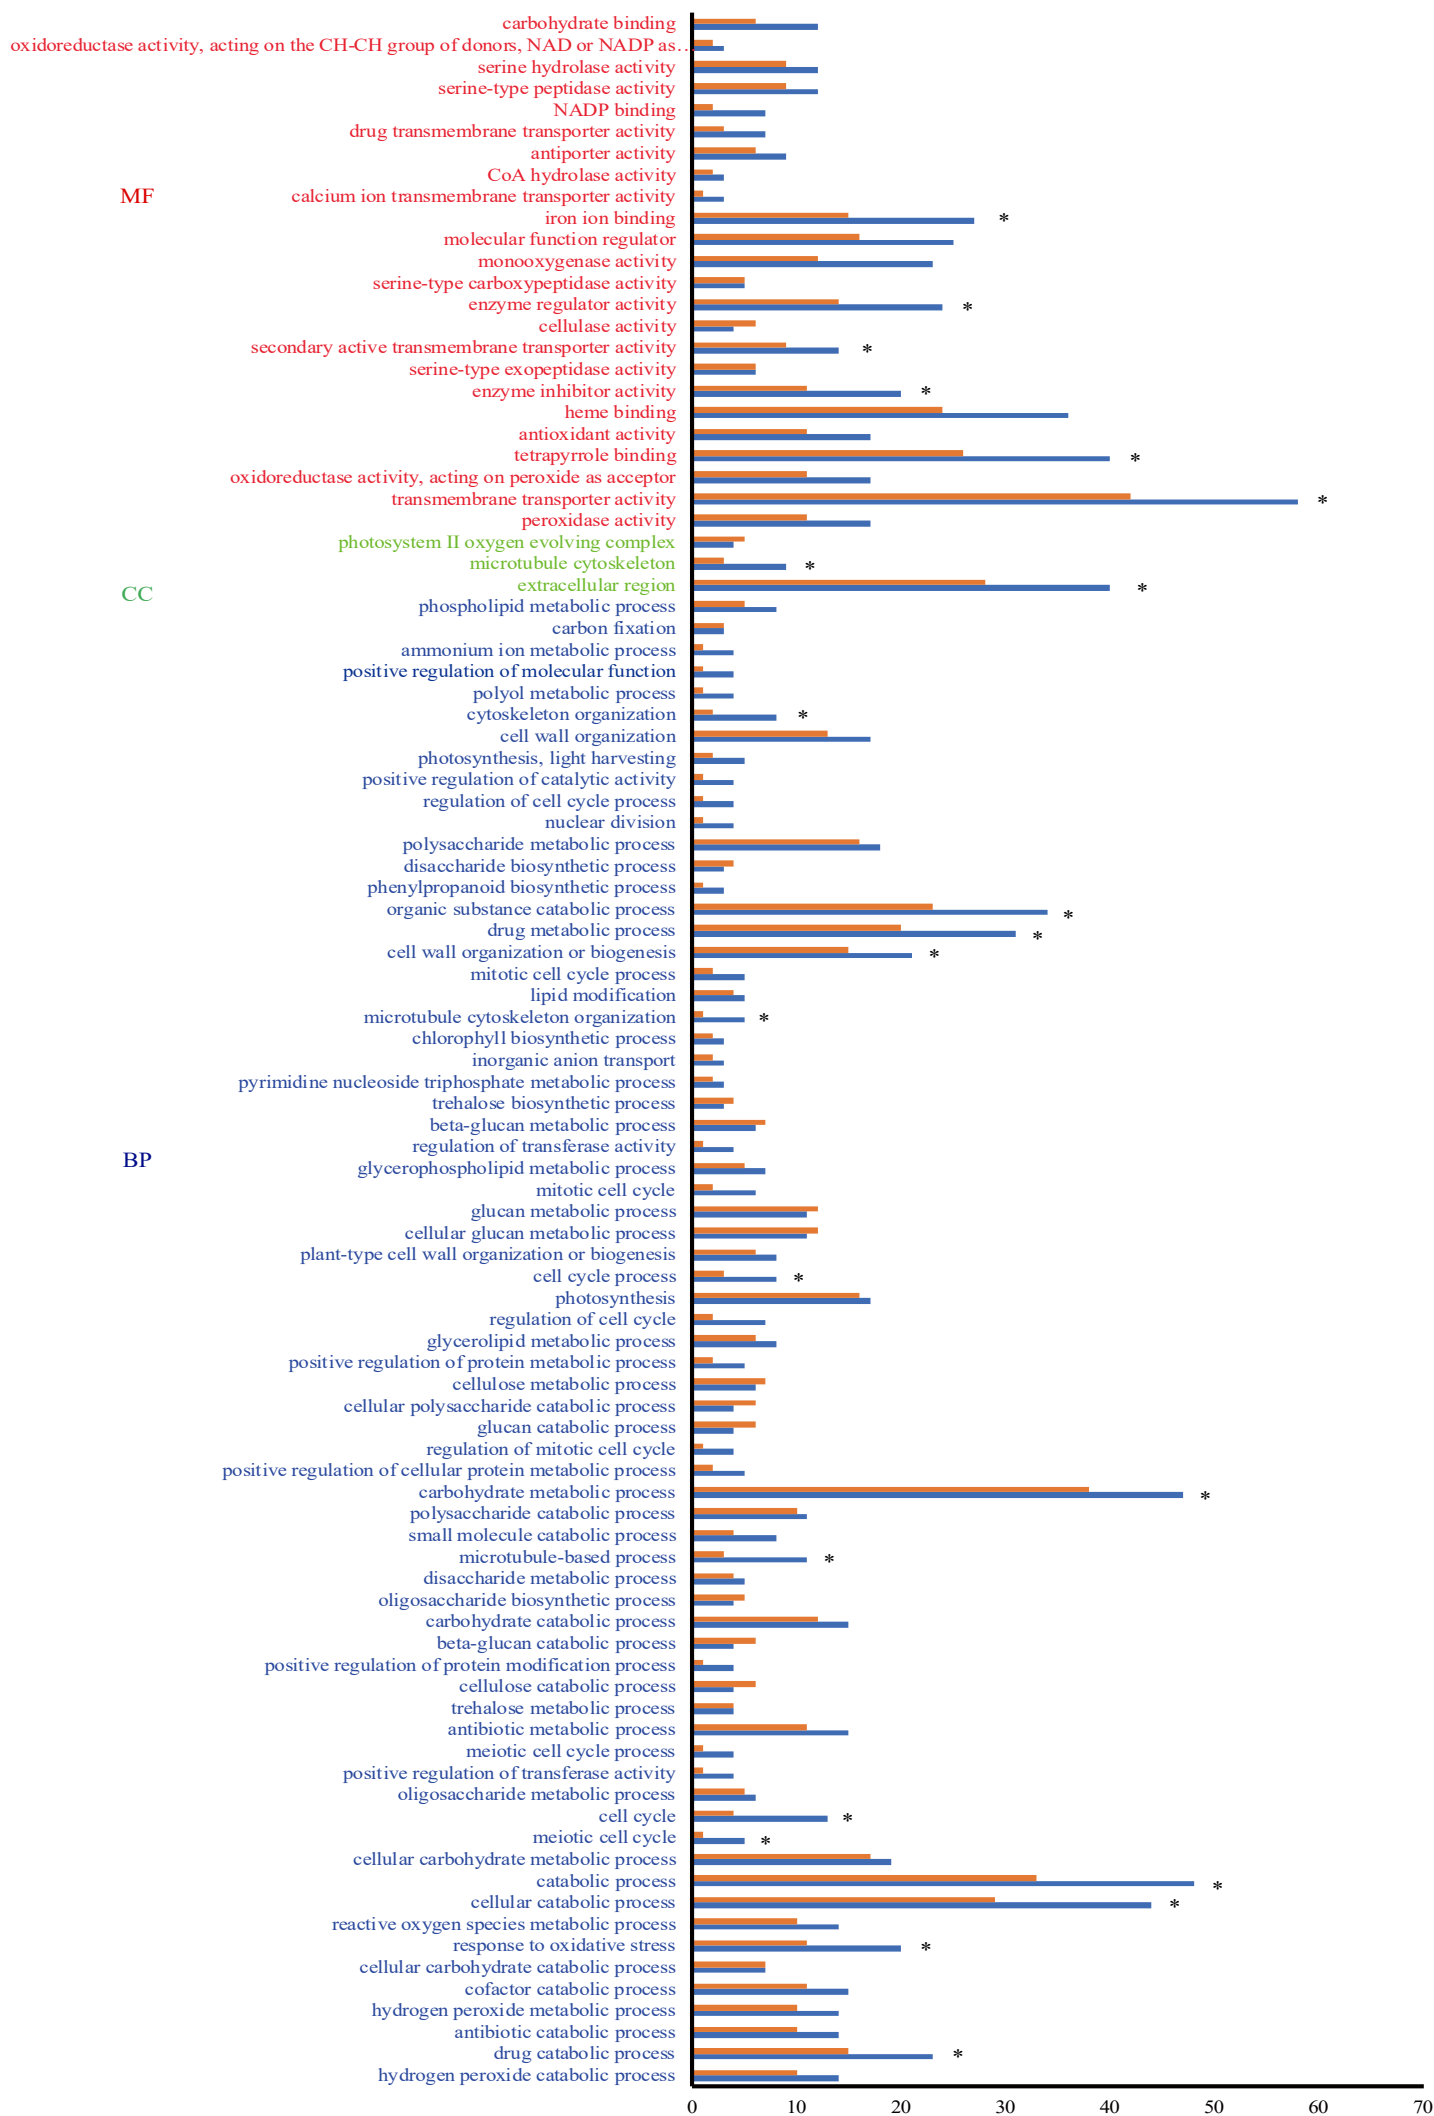

Figure S2
