# Supplementary material for: Comparative Transcriptome Analysis of Deep-Rooting and Shallow-Rooting Potato (Solanum tuberosum L.) Genotypes under Drought Stress
Source: Plants (Basel). 2022 Aug 3;11(15):2024. doi: 10.3390/plants11152024 (PMC9370241; doi:10.3390/plants11152024)
Supplement: Supplementary file 1 [file plants-11-02024-s001.zip › Table S1.xlsx]

## Sheet: TableS1
Table S1. Primer for qPCR
PGSC0003DMG400011980-F	AGCCAGAGTCGTTTGGACTG
PGSC0003DMG400011980-R	TGGCACTGAAACAACACCCT
PGSC0003DMG400008011-F	GAGCTCGAAAGCAGGCCTAT
PGSC0003DMG400008011-R	CATTTCTGGAGGATCCGAGCA
PGSC0003DMG400000064-F	TGCCTCTCCTCAGATCCCTT
PGSC0003DMG400000064-R	CCTCTGACCACCGCATGTAG
PGSC0003DMG400017231-F	CGGAGTTCTTAACGCTGCTC
PGSC0003DMG400017231-R	CGGGTTTTGCCTCAATCACC
PGSC0003DMG400007110-F	TGCATGGCGAGTCAAGGAAT
PGSC0003DMG400007110-R	GCTAGCAGGATTTAGCCCCC
PGSC0003DMG400026260-F	TTGGGAATGGGAAAATCCTGT
PGSC0003DMG400026260-R	GGCTCCGATTTCACATTTGGG
PGSC0003DMG401015926-F	AGTGGAGTTGTTGTGGCGAA
PGSC0003DMG401015926-R	GGATCATAGCCTGGCTGCTT
PGSC0003DMG400012962-F	GCCCGCTTTGCTGATATTGG
PGSC0003DMG400012962-R	ACTTTCCTGTCTCCACCCCT
PGSC0003DMG400012261-F	GGTTGGTGGGGGTGTTTCTT
PGSC0003DMG400012261-R	TCCACTATTGGACCTGCACAC
PGSC0003DMG40002272-F	CACACTCATGGACGACGAGA
PGSC0003DMG40002272-R	AGTTGCGCAGACTCTTCACT
PGSC0003DMG400009112-F	TGGCGACGATAGGATCAACG
PGSC0003DMG400009112-R	TCAAAGCCACCGTCTCACAA
PGSC0003DMG400018811-F	AGTTGCAGACCCCCTTCTTG
PGSC0003DMG400018811-R	AGTTTTGGGGTTGTGGGGTT
actin-F	AGGAGCATCCTGTCCTCCTAA
actin-R	CACCATCACCAGAGTCCAACA
